# Supplementary material for: Comprehensive analysis of phospholipids and glycolipids in the opportunistic pathogen Enterococcus faecalis
Source: PLoS One. 2017 Apr 19;12(4):e0175886. doi: 10.1371/journal.pone.0175886 (PMC5397010; doi:10.1371/journal.pone.0175886)
Supplement: S2 Table — (XLSX) [file pone.0175886.s003.xlsx]

## Sheet: Table S2
Table S2
Chipcube HILIC
Lipid	Ion	RT [min]	Sum Composition	m/z	Acyl Groups
CL	[M-2H]2-	5.00– 7.00	64:2	673.495	14:0, 14:1, 16:0, 16:1, 18:1
CL	[M-2H]2-	5.00– 7.00	64:1	674.499	14:0, 16:0, 18:1
CL	[M-2H]2-	5.00– 7.00	64:0	675.495	14:0, 16:0, 18:0
CL	[M-2H]2-	5.00– 7.00	65:4	678.53	14:0, 14:1, 16:0, 16:1, 17:2, 17:1, 18:1
CL	[M-2H]2-	5.00– 7.00	65:3	679.553	14:0, 16:0, 17:2, 18:1
CL	[M-2H]2-	5.00– 7.00	66:3	686.533	14:0, 14:1, 16:0, 16:1, 18:1
CL	[M-2H]2-	5.00– 7.00	66:2	687.496	14:0, 16:0, 16:1, 18:1
CL	[M-2H]2-	5.00– 7.00	66:1	688.504	14:0, 16:0, 16:1, 18:1
CL	[M-2H]2-	5.00– 7.00	66:0	689.504	14:0, 16:0, 18:0
CL	[M-2H]2-	5.00– 7.00	67:4	692.546	14:0, 14:1, 16:0, 16:1, 17:0, 18:1
CL	[M-2H]2-	5.00– 7.00	67:3	693.562	14:0, 16:0, 16:1, 17:2, 18:1, 19:1
CL	[M-2H]2-	5.00– 7.00	67:2	694.504	14:0, 16:0, 16:1, 17:1, 18:1, 19:1
CL	[M-2H]2-	5.00– 7.00	67:1	695.496	14:0, 16:0, 16:1, 17:1, 18:1, 19:1
CL	[M-2H]2-	5.00– 7.00	68:3	700.544	14:0, 16:2, 16:1, 16:0, 18:1
CL	[M-2H]2-	5.00– 7.00	68:2	701.508	14:0, 16:0, 16:1, 18:1
CL	[M-2H]2-	5.00– 7.00	68:1	702.518	14:0, 16:0, 16:1, 18:1
CL	[M-2H]2-	5.00– 7.00	68:0	703.514	14:0, 16:0, 18:0
CL	[M-2H]2-	5.00– 7.00	69:2	708.506	14:0, 16:0, 17:0, 18:1, 18:0, 19:1
CL	[M-2H]2-	5.00– 7.00	69:1	709.511	14:0, 16:0, 17:0, 18:1, 18:0, 19:1
CL	[M-2H]2-	5.00– 7.00	70:4	713.555	16:0, 18:1
CL	[M-2H]2-	5.00– 7.00	70:3	714.568	16:1, 16:0, 18:1
CL	[M-2H]2-	5.00– 7.00	70:2	715.519	16:1, 16:0, 18:1
CL	[M-2H]2-	5.00– 7.00	70:1	716.531	16:1, 16:0, 18:1
